# Supplementary material
Source: Royal Society of Chemistry journal article supplement (doi:10.1039/d6ta01192f)
Supplement: d6ta01192f1.pdf [file d6ta01192f1.pdf]

23 **Text S1.** Chemicals and materials

24 N, N-dimethylformamide (DMF,  $\geq 99.5\%$ ), Cupric acetate anhydrous ( $C_4H_6CuO_4$ ,  $\geq 98\%$ )  
25 were purchased from the Shanghai Aladdin Biological Technology Co., Ltd. Polyacrylonitrile  
26 (PAN, average MW 150,000), Sodium bicarbonate ( $NaHCO_3$ , 99.9%), Sodium hydroxide  
27 (NaOH, 99%) and Isopropyl alcohol ( $C_3H_8O$ ,  $\geq 99.5\%$ ) were purchased from Shanghai Macklin  
28 Biochemical Co., Ltd. The anion exchange membrane (FAA-3-PK-130) and Pt foil ( $20 \times 20 \times 1$   
29 mm) were purchased from Suzhou Siner Technology Co., Ltd. The carbon dioxide (99.999%  
30 purity) and nitrogen (99.999% purity) were purchased from Shenzhen Huatepeng Gas  
31 Company. Ultra-pure deionized water ( $18.2 M\Omega \cdot cm$ ) used in all the experiments was obtained  
32 from the Milli-Q® Direct 8 system. All reagents were used without further purification.

33

34 **Text S2.** Fabrication of Cu-SA-TCA and Cu-NP-TCA

35 PAN of 1 g was dissolved into DMF of 10 g forming a homogeneous colloidal solution.  
36 After adding 0.1/0.5 g (for single atom and nanoparticles) of  $Cu(CH_3COO)_2$ , the solution was  
37 magnetically stirred for 48 h at  $50\text{ }^\circ C$  to form a transparent solution. Then the solution was  
38 injected into a syringe pump and ejected at a constant rate of 0.01 mL/min and an applied  
39 voltage of 15 kV. The distance between the needle tip and the collector was 15 cm. Through  
40 electrospinning, a nanostructure fiber composed of carbon and copper precursors was produced.  
41 The obtained nanofiber was directly soaked into 10% iso-propyl alcohol solutions (in water),  
42 then transferred into a cylinder vessel model and dried in freeze-drying for 72 h. The nanofiber

43 aerogel is stabilized at 250°C in air for 2 hours, then carbonized at 900°C at 5°C min<sup>-1</sup> under  
44 nitrogen for 2 hours, forming the Cu-SA-TCA/Cu-NP-TCA.

45

#### 46 **Text S3.** Material characterizations

47 The XRD patterns of the samples were collected using a Shimadzu XRD-6000  
48 diffractometer (40 kV, 40 mA, graphite-filtered Cu K $\alpha$  radiation,  $\lambda$  = 0.15418 nm). SEM  
49 performed on a Zeiss Supra 55 was used to obtaining the microstructure morphology of the  
50 catalysts. HRTEM photographs were taken using a JEOL JEM-2100 microscope. XPS was  
51 employed using a Thermo Scientific K-Alpha to assess the chemical state of the catalysts. Cu  
52 X-ray absorption spectra (XAS) measurement was performed at the beamline 1W1B of the  
53 Beijing Synchrotron Radiation Facility (BSRF), Institute of High Energy Physics (IHEP),  
54 Chinese Academy of Sciences (CAS). The X-ray absorption near edge structure (XANES)  
55 experiments were performed at the BL12B-A beamline in the National Synchrotron Radiation  
56 Laboratory (NSRL), University of Science and Technology of China (USTC), Hefei, P. R.  
57 China. The in situ attenuated total reflection Fourier transform infrared (ATR-FTIR)  
58 spectroscopy measurements were conducted using a custom electrochemical cell equipped with  
59 a Ge internal reflection element. To prepare the working electrode, the as-synthesized samples  
60 were ground into fine powders and drop-cast onto a glassy carbon electrode. A Pt wire and an  
61 Ag/AgCl electrode were employed as the counter and reference electrodes, respectively. The  
62 electrochemical tests were performed at from open circuit potential (OCP) to -2.0 V vs. RHE  
63 in 1 M KOH. Prior to the spectral acquisition, the electrolyte was first purged with Ar for 30

64 min to remove dissolved oxygen, followed by continuous CO<sub>2</sub> bubbling at a flow rate of ~30  
65 mL·min<sup>-1</sup> for another 30 min to reach saturation. A background IR spectrum was subsequently  
66 recorded under open-circuit conditions. Finally, upon applying the fixed cathodic potential  
67 under continuous CO<sub>2</sub> flow, in-situ spectra were continuously acquired at a resolution of 4 cm<sup>-1</sup>.  
68 Each final spectrum was obtained by co-adding 32 interferograms over a collection period of  
69 30 s.

70

#### 71 **Text S4.** Electrochemical measurements

72 All electrochemical measurements in this study were conducted on a custom coaxial three  
73 electrode system using the electrochemical workstation (AUTOLAB PGSTAT302N). In the  
74 cylindrical cell, the work electrode was the TCA assembled with a porous stone diffuser, and  
75 the Hg/HgO (saturated with 3.5 M KCl) and a cylindrical Pt mesh were used as the reference  
76 electrode and counter electrode, respectively. An anion exchange membrane (FAA-3-PK-130)  
77 was adopted to separate the reactor into an inner and an outer compartment. All potentials were  
78 referenced to reversible hydrogen electrode (RHE) with the equation of  $E \text{ (vs. RHE)} = E$   
79  $(\text{Hg/HgO}) + 0.098 \text{ V} + 0.059 \text{ V} \times \text{pH}$ . The CO<sub>2</sub>-saturated 0.5 M NaHCO<sub>3</sub> or 1 M KOH was  
80 used as the electrolyte and the amount of electrolyte in each compartment was 30 mL. Prior to  
81 the measurement for CO<sub>2</sub>RR performance, the electrolyte was purified with high purity CO<sub>2</sub>  
82 (99.999%) for at least 40 min. The electrochemical active surface area (ECSA) was determined  
83 by measuring double-layer capacitance ( $C_{dl}$ ) using Cyclic Voltammetry (CV) in a non-Faradaic  
84 potential window (from 0.88 to 0.98 V vs. RHE) at various scan rates of 40, 60, 80, 100, and

85 120 mV s<sup>-1</sup>. Electrochemical impedance spectroscopy (EIS) measurements were performed in  
86 a frequency range from 10<sup>6</sup> to 10<sup>-2</sup> Hz with an amplitude of 5 mV at -1.0 V vs. RHE. The  
87 gaseous products were identified and quantified in real time from the cathodic part of the  
88 CO<sub>2</sub>RR reactor by online gas chromatography (GC, model iGC 7200A) equipped with flame  
89 ionization detectors (FIDs for carbon product detection) and a thermal conductivity detector  
90 (TCD for H<sub>2</sub> detection). The gas products from the CO<sub>2</sub>RR reactor were injected into the GC at  
91 regular intervals of 20 min during continuous 1 h chronoamperometry measurements. The  
92 actual amounts of each gas (H<sub>2</sub>, CO and hydrocarbons) produced during the  
93 chronoamperometric test were calculated from the peak area of the GC spectrum with  
94 conversion factors based on calibration of standard gases. The liquid products were analyzed  
95 by using NMR spectroscopy (Bruker AVANCE AVIII 400) with dimethyl sulfoxide as an  
96 internal standard. Specifically, 500 μL of the reacted electrolyte, 100 μL of D<sub>2</sub>O and 10 μL  
97 dimethyl sulfoxide solution (10 μL of dimethyl sulfoxide in 5 mL of deionized water) were  
98 mixed together. The one-dimensional <sup>1</sup>H spectrum was measured with the water suppression  
99 method.

100

#### 101 **Text S5.** Finite element modeling

102 The electric potential distribution and current density profiles within different electrode  
103 configurations were modeled via Primary Current Distribution. Two distinct geometric models  
104 were constructed to represent the experimental setups: the proposed coaxial cell, characterized  
105 by radial symmetry, and the conventional planar H-type cell. To focus on the geometric

106 influence on the electric field, the primary current distribution was calculated by solving the  
 107 Equation (1)-(3) within the electrolyte domain, assuming constant ionic conductivity. This  
 108 computational approach allows for a quantitative assessment of the ohmic voltage drop and the  
 109 homogeneity of electric field lines across the working electrode surface.

$$\mathbf{i}_s = -\sigma_s \nabla \phi_s, \nabla \cdot \mathbf{i}_s = Q_s \quad (1)$$

$$\mathbf{i}_l = -\sigma_l \nabla \phi_l, \nabla \cdot \mathbf{i}_l = Q_l \quad (2)$$

$$\phi_s - \phi_l = E_{eq} \quad (3)$$

110 Where  $\sigma$  denotes the conductivity.  $\phi$  represents electric potential.  $s$  and  $l$  represents the  
 111 electrode and electrolyte, respectively.  $E_{eq}$  represents the equilibrium potential for reaction.

112 To simulate the CO<sub>2</sub> mass transport within the micro-channels of the aerogel, a simplified  
 113 2D rectangular axisymmetric model with a length of 10  $\mu\text{m}$  and a radius of 1  $\mu\text{m}$  was designed  
 114 to represent the single-pore environment. Transport of Diluted Species coupled with Laminar  
 115 Flow and Stationary study were used for this modeling. The side wall of the pore was defined  
 116 as the active flux boundary where CO<sub>2</sub> is consumed. To assess the impact of the reactant phase  
 117 on transport efficiency, two distinct operating modes were investigated:

118 (I) Liquid-diffusion mode: The pore domain was defined as liquid water with a CO<sub>2</sub>  
 119 diffusion coefficient ( $D$ ,  $2\text{e-}9 \text{ m}^2/\text{s}$ ). In this scenario, the reaction flux is governed by Equation  
 120 (4), representing a process limited by liquid-phase mass transfer and intrinsic kinetics.

121 (II) Gas-flow-through mode: A laminar flow was defined with a constant inlet velocity  
 122 (0.1 m/s) boundary condition to simulate pressure-driven CO<sub>2</sub> supply. The corresponding  
 123 velocity profile was coupled to the similar the convection-diffusion equation with liquid-

124 diffusion mode.

$$J = -k_{\text{react}} \cdot c \quad (4)$$

125 where  $J$  represents the local molar flux of CO<sub>2</sub> consumption.  $k_{\text{react}}$  (0.01 m/s) is the intrinsic  
126 electrochemical reaction rate constant, assumed to be sufficiently large to simulate the mass-  
127 transport-limited regime.  $c$  (33 mol/m<sup>3</sup>) denotes the maximum soluble CO<sub>2</sub> concentration in the  
128 bulk liquid phase. The model was solved using a stationary solver with physics-controlled fine  
129 meshing to ensure numerical stability and accuracy.

130

131

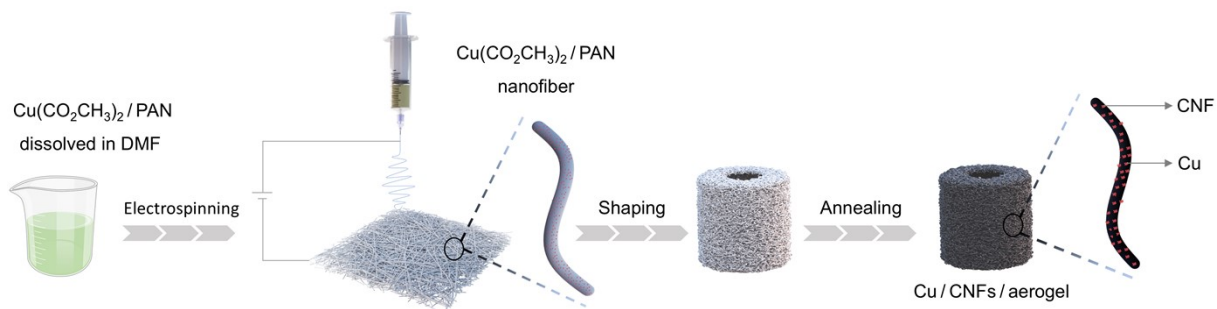

132

133 **Fig. S1.** Schematic illustration of (Cu-)TCA fabrication.

134

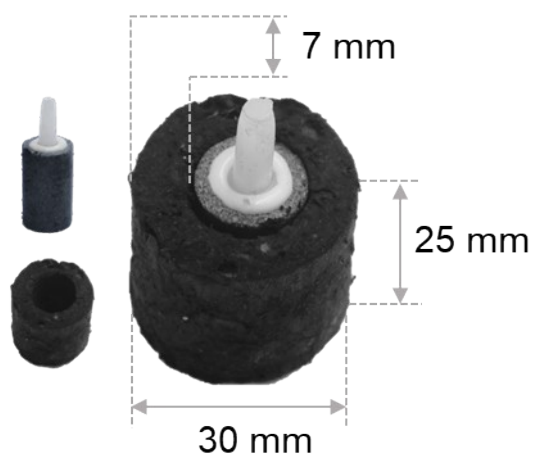

135

136 **Fig. S2.** Digital photos of the TCA electrodes.

137

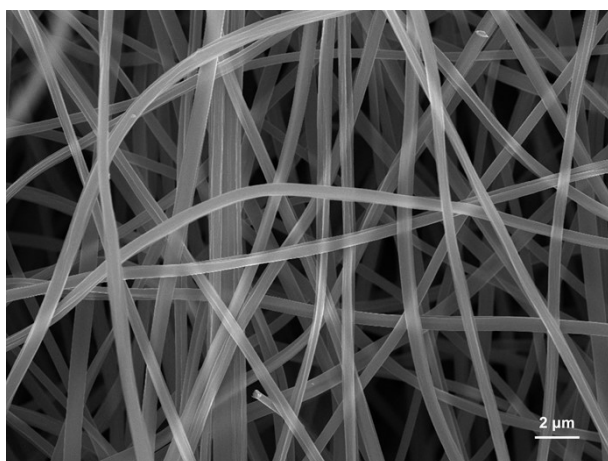

138

139 **Fig. S3.** SEM image of TCA.

140

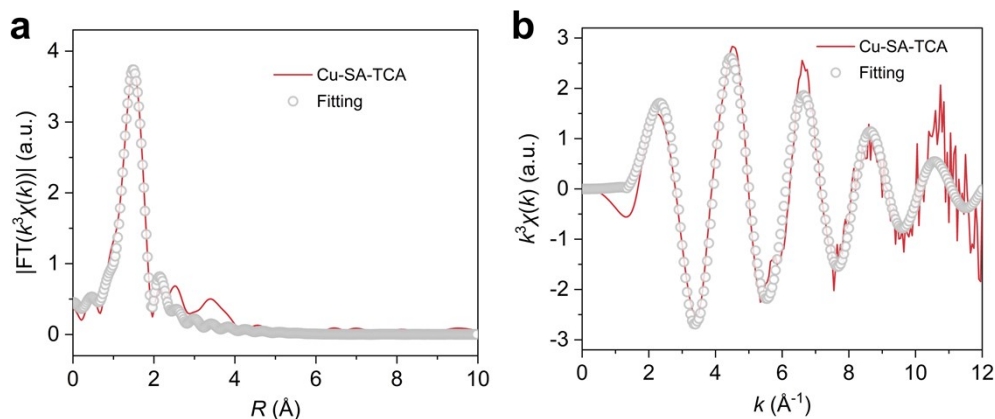

141

142 **Fig. S4.** EXAFS fitting results of Cu-SA-TCA. (a) The  $k^3$ -weighted FT EXAFS spectra in R-  
 143 space, (b) The EXAFS oscillation signals in k-space.

144

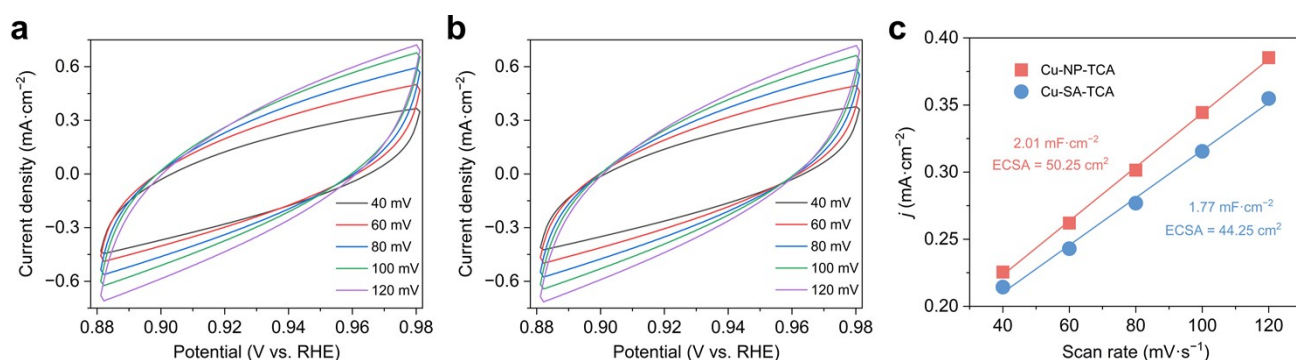

145

146 **Fig. S5.** CV measurements and for determining the ECSA for Cu-NP-TCA and Cu-SA-TCA.

147 (a) CV curves measured from 0.88 to 0.98 V vs. RHE at scan rates of 40, 60, 80, 100, and 120  
 148  $\text{mV s}^{-1}$ . (b) The non-Faradaic current density measured at 0.93 V vs. RHE as a function of the  
 149 scan rate. The absolute value of the slope is taken as the double-layer capacitance ( $C_{dl}$ ) of the  
 150 electrode. The ECSA is calculated by the equation:  $\text{ECSA} = C_{dl} / C_s$ , where  $C_s$  is taken as 40  
 151  $\mu\text{F}\cdot\text{cm}^{-2}$  in this study, which is an average value for carbon materials).<sup>1</sup>

152

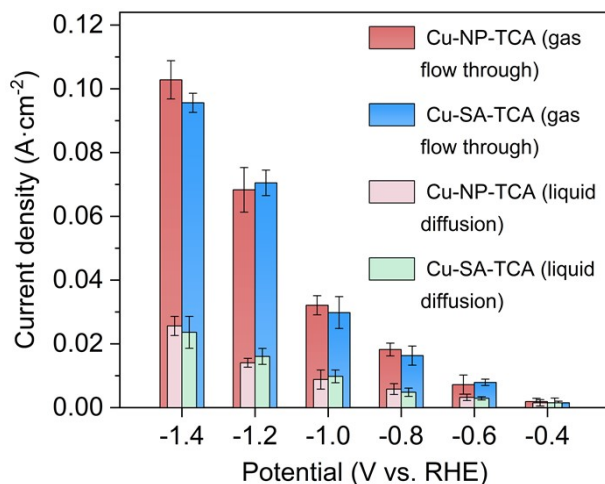

153

154 **Fig. S6.** Steady-state current densities of the Cu-NP-TCA and Cu-SA-TCA electrodes operating  
 155 under gas-flow-through mode versus conventional liquid diffusion mode across a potential  
 156 range of  $-0.4$  V to  $-1.4$  V vs. RHE.

157

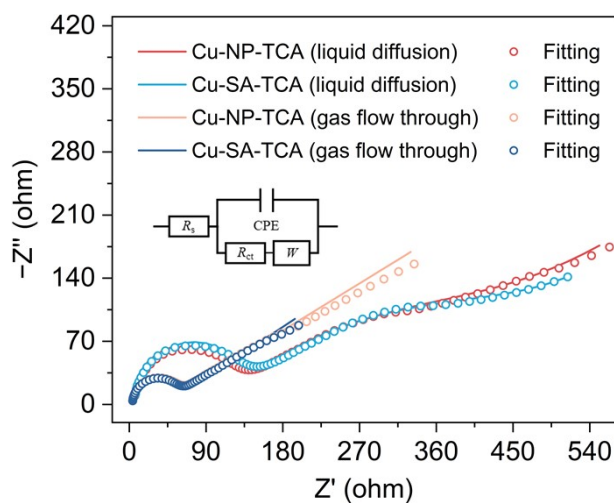

158

159 **Fig. S7.** Nyquist plots and of Cu-NP-TCA and Cu-SA-TCA under  $\text{CO}_2$  bubbling and flowing  
 160 through conditions and corresponding fitted curves based on the equivalent circuit model (the  
 161 inset).

162

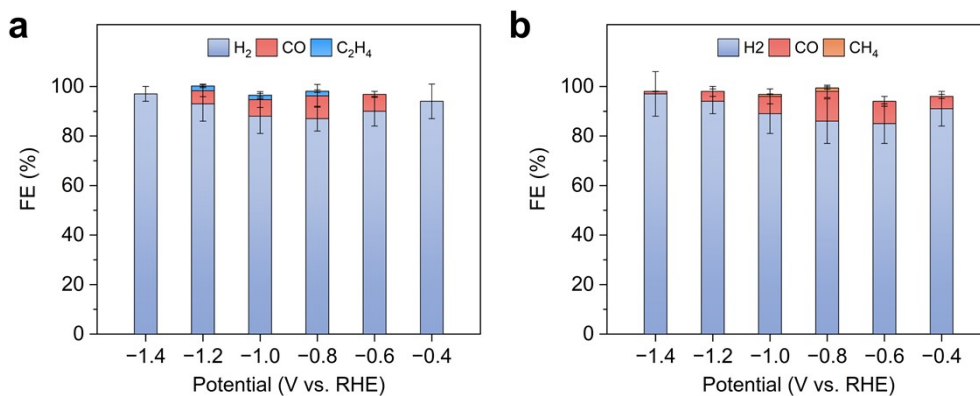

163

164 **Fig. S8.** FE for detected carbonaceous products of (a) Cu-NP-TCA and (b) Cu-NP-TCA in

165 neutral conditions operating in conventional gas diffusion mode.

166

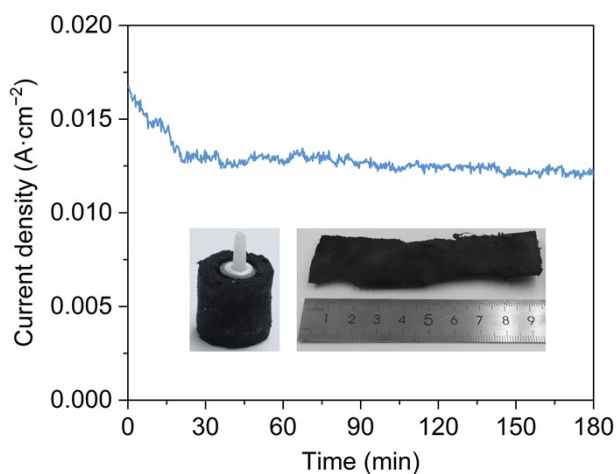

167

168 **Fig. S9.** The chronoamperometry curve of TCA during 3 h CO<sub>2</sub> penetration at with a flow rate

169 of 50 sccm and the inset shows digital photos of TCA after operation.

170

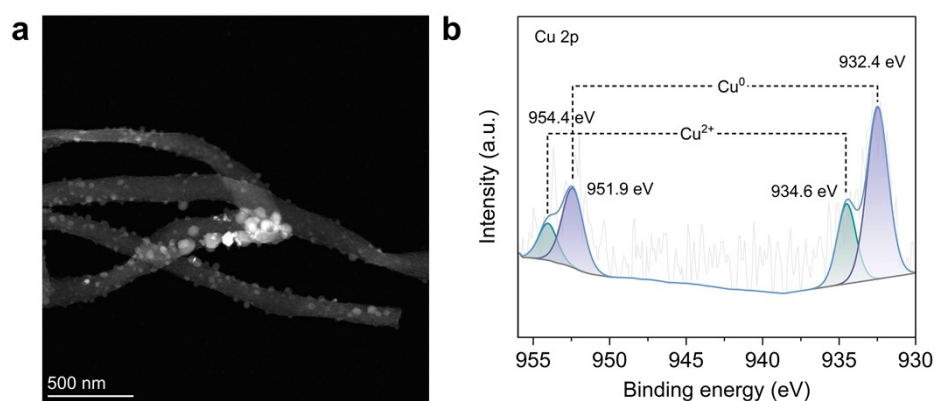

171

172 **Fig. S10.** (a) HRTEM image and (b) Cu 2p XPS spectrum of the used Cu-NP-TCA.

173

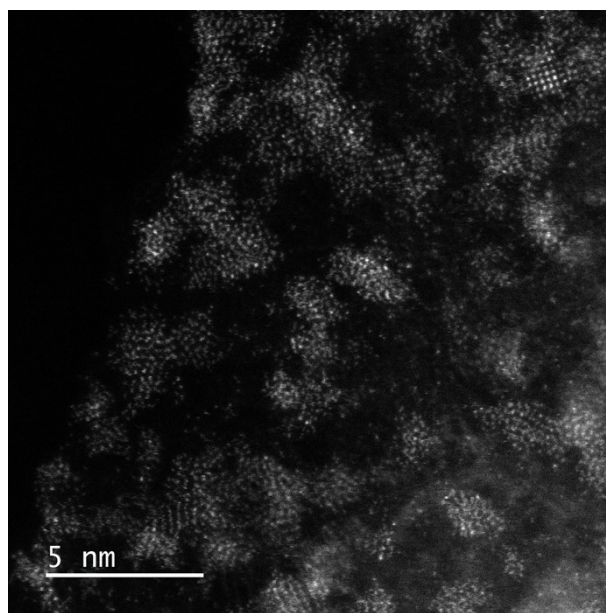

174

175 **Fig. S11.** HAADF-STEM image of the used Cu-SA-TCA.

176

177

178

179 **Table S1.** EXAFS fitting parameters at the Cu K-edge for Cu-SA-TCA.

| Samples   | Shell | CN  | $R$ (Å) | $\sigma^2$ (Å <sup>2</sup> ) | $\Delta E_0$ (eV) | $R$ factor (%) |
|-----------|-------|-----|---------|------------------------------|-------------------|----------------|
| Cu-SA-TCA | Cu-N  | 3.9 | 1.94    | 0.009                        | -2.1              | 0.02           |

180 Note: CN, coordination number;  $R$ , distance between absorber and backscatter atoms;  $\sigma^2$ ,

181 Debye-Waller factor to account for both thermal and structural disorders;  $\Delta E_0$ , inner potential

182 correction;  $R$  factor indicates the goodness of the fit.

183

184 **Table S2.** Impedance parameters deduced from the equivalent circuit model of Nyquist plot.

|           |                  | $R_s/\Omega$ | $R_{ct}/\Omega$ | $R_w/\Omega$ (1 Hz) |
|-----------|------------------|--------------|-----------------|---------------------|
| Cu-NP-TCA | Liquid diffusion | 3.68         | 105             | 633                 |
|           | Gas flow through | 4.32         | 35.4            | 345                 |
| Cu-SA-TCA | Liquid diffusion | 4.07         | 114             | 752                 |
|           | Gas flow through | 4.08         | 39.5            | 423                 |

185

186

187

188 **Table S3.** Comparison of C<sub>2</sub>H<sub>4</sub> production performance of Cu-NP-TCA with reported  
 189 literatures.

| <b>Materials</b>                          | <b>Potential<br/>(V vs. RHE)</b> | <b>Current density<br/>(mA·cm<sup>-2</sup>)</b> | <b>FE<br/>(%)</b> | <b>Ref.</b> |
|-------------------------------------------|----------------------------------|-------------------------------------------------|-------------------|-------------|
| Cu-NP-TCA                                 | -1.0V                            | 35                                              | 29                | This work   |
| Cu <sub>g</sub> -PCN                      | -1.1V                            | 7.5                                             | 20                | [2]         |
| Cu-C-N900                                 | -1.4V                            | 25                                              | 24.8              | [3]         |
| PACuDBC-2                                 | -1.1V                            | 35                                              | 12                | [4]         |
| Cu <sub>10</sub> -Sn                      | -1.29V                           | 48                                              | 12                | [5]         |
| Cavity cubes                              | -1.3V                            | 16                                              | 5.75              | [6]         |
| <a href="#">Cu<sub>2</sub>O@CM</a>        | -1.1V                            | 15                                              | 28.7              | [7]         |
| Cu <sub>90</sub> Ag <sub>10</sub>         | -                                | 40                                              | 33                | [8]         |
| Cu NPs/Ni-N-C-2                           | -0.9V                            | 11.7                                            | 14.27             | [9]         |
| Cu/C_S                                    | -1.5V                            | 10                                              | 14.07             | [10]        |
| Gd-CuO-w                                  | -1.2V                            | 20.8                                            | 24                | [11]        |
| Ag <sub>85</sub> Cu <sub>15</sub> aerogel | -1.0V                            | 7.5                                             | 12.9              | [12]        |
| Pt1Ni1@Cu1                                | -1.2V                            | 24                                              | 30.9              | [13]        |
| CuO-Sn1%                                  | -1.5V                            | 20.8                                            | 17.7              | [14]        |
| Cu-10/NC                                  | -1.1V                            | 6.5                                             | 30.3              | [15]        |
| electrodeposited Cu <sub>2</sub> O        | -1.13V                           | 9.6                                             | 26                | [16]        |
| Cu mesocrystals                           | -0.99V                           | 10                                              | 27.2              | [17]        |
| Ag@Cu Np                                  | -1.2V                            | 20.4                                            | 41.3              | [18]        |

190

191

## 192 Reference

193

- 194 1. H. Fei, J. Dong, M. J. Arellano-Jiménez, G. Ye, N. Dong Kim, E. L. G. Samuel, Z.  
195 Peng, Z. Zhu, F. Qin, J. Bao, M. J. Yacaman, P. M. Ajayan, D. Chen and J. M. Tour,  
196 *Nature Communications*, 2015, **6**, 8668.
- 197 2. H. G. El-Aqapa, G. E. Khedr, I. M. Badawy, A. M. Agour, A. M. Abdelmohsen and N.  
198 K. Allam, *Journal of Materials Chemistry A*, 2025, **13**, 7091-7095.
- 199 3. A. Guan, Z. Chen, Y. Quan, C. Peng, Z. Wang, T.-K. Sham, C. Yang, Y. Ji, L. Qian,  
200 X. Xu and G. Zheng, *ACS Energy Letters*, 2020, **5**, 1044-1053.
- 201 4. S. Wei, X. Jiang, C. He, S. Wang, Q. Hu, X. Chai, X. Ren, H. Yang and C. He,  
202 *Journal of Materials Chemistry A*, 2022, **10**, 6187-6192.
- 203 5. H. Wang, F. Zhang, Y. Li, Y. Pang, X. Zhao, Z. Song, W. Wang, J. Sun and Y. Mao, *J*  
204 *Colloid Interface Sci*, 2025, **678**, 506-514.
- 205 6. G. Cao, X. Cao, M. Shan, M. Li, X. Zhu, J. Han, Q. Ge and H. Wang, *Journal of Solid*  
206 *State Electrochemistry*, 2022, **26**, 1527-1540.
- 207 7. S. Min, Z. Wang, X. Xu, J. He, M. Sun, W. Lin and L. Kang, *Applied Surface Science*,  
208 2024, **663**.
- 209 8. Y. E. Jeon, Y. N. Ko, J. Kim, H. Choi, W. Lee, Y. E. Kim, D. Lee, H. Y. Kim and K.  
210 T. Park, *Journal of Industrial and Engineering Chemistry*, 2022, **116**, 191-198.
- 211 9. L.-L. Zhang, K.-A. Wang, G.-R. Zhu, J.-Y. Shi and H.-B. Zhu, *Journal of Materials*  
212 *Science*, 2023, **58**, 17200-17210.
- 213 10. H. Noh, Y. Park, A. Bhadouria and B. M. Tackett, *Journal of Catalysis*, 2024, **437**.
- 214 11. Z. Cao, Z. Chen, H. Sun, S. Yao, Z. Liu, F. Li, X. Yang, W. Zhou, J. Fan, H. Wang  
215 and L. Liu, *Journal of Materials Chemistry A*, 2024, **12**, 29165-29173.
- 216 12. J. Wang, J. Soo - Hyun Park, A. Imam, Z. Yu, Z. Fang, M. Noroozifar and H. B.  
217 Kraatz, *ChemCatChem*, 2024, **16**.
- 218 13. Y. Xiao, Y. Yang, W. Liu and J. Liu, *Journal of Materials Chemistry A*, 2025, **13**,  
219 26812-26822.
- 220 14. H. Chuai, S. Liu, Z. Liang, H. Liu, Q. Zhao and S. Zhang, *Chemical Engineering*  
221 *Journal*, 2025, **518**.
- 222 15. J. Han, J. Ma, J. Zhou, X. Chen, Z. Wan and Y. Zhao, *Applied Surface Science*, 2023,  
223 **609**.
- 224 16. D. Kim, S. Lee, J. D. Ocon, B. Jeong, J. K. Lee and J. Lee, *Phys Chem Chem Phys*,  
225 2015, **17**, 824-830.
- 226 17. C. S. Chen, A. D. Handoko, J. H. Wan, L. Ma, D. Ren and B. S. Yeo, *Catalysis*  
227 *Science & Technology*, 2015, **5**, 161-168.
- 228 18. L. Hou, J. Han, C. Wang, Y. Zhang, Y. Wang, Z. Bai, Y. Gu, Y. Gao and X. Yan,  
229 *Inorganic Chemistry Frontiers*, 2020, **7**, 2097-2106.

230
